# Supplementary material for: Development and multimodal validation of a substance misuse algorithm for referral to treatment using artificial intelligence (SMART-AI): a retrospective deep learning study
Source: PubMed Central journal article supplement (PMC9159760; doi:10.1016/s2589-7500(22)00041-3), 2022-06
Supplement: NIHMS1810680-supplement-1.pdf [file NIHMS1810680-supplement-1.pdf]

# THE LANCET

## Digital Health

### Supplementary appendix

This appendix formed part of the original submission and has been peer reviewed. We post it as supplied by the authors.

Supplement to: Afshar M, Sharma B, Dligach D, et al. Development and multimodal validation of a substance misuse algorithm for referral to treatment using artificial intelligence (SMART-AI): a retrospective deep learning study. *Lancet Digit Health* 2022; **4**: e426–35.

## APPENDIX

### Appendix 1. Characteristics between internal and external validation hospital sites

| Hospital Characteristics                   | Rush University Medical Center                                                                                                  | Loyola University Medical Center                                                                                                |
|--------------------------------------------|---------------------------------------------------------------------------------------------------------------------------------|---------------------------------------------------------------------------------------------------------------------------------|
| Adult/Pediatric                            | Yes/Yes                                                                                                                         | Yes/Yes                                                                                                                         |
| Hospital type                              | Private                                                                                                                         | Private                                                                                                                         |
| Location and primary community area served | West Chicago:<br>60607, 60608, 60612, 60622, 60623, 60624,<br>60661                                                             | West and Southwest Suburbs:<br>60153, 60402, 60104                                                                              |
| Inpatient Race/Ethnicity                   | NH White: 50.4%<br>NH Black: 35.6%<br>Hispanic White: 0.3%<br>Hispanic Black: 1.3%<br>Other/Unknown: 0.2%                       | NH White: 61.1%<br>NH Black: 21.6%<br>Hispanic White: 5.3%<br>Hispanic Black: 0.1%<br>Other/Unknown: 11.9%                      |
| Authorized Beds, n                         | 727                                                                                                                             | 547                                                                                                                             |
| EHR System (year deployed)                 | Epic (2010)                                                                                                                     | Epic (2007)                                                                                                                     |
| Inpatient Insurance                        | <u>Inpatients:</u><br>Medicare: 37.2%<br>Medicaid: 22.9%<br>Private insurance: 35.3%<br>Private Pay: 2.3%<br>Charity Care: 2.2% | <u>Inpatients†</u><br>Medicare: 41.7%<br>Medicaid: 21.9%<br>Private insurance: 33.1%<br>Private pay: 0.9%<br>Charity care: 2.4% |
| Emergency Room Visits                      | 66,152                                                                                                                          | 41,123                                                                                                                          |

## Appendix 2. TRIPOD Checklist: Prediction Model Development and Validation

| Section/Topic                | Item | Checklist Item                                                                                                                                                                                       | Page        |
|------------------------------|------|------------------------------------------------------------------------------------------------------------------------------------------------------------------------------------------------------|-------------|
| <b>Title and abstract</b>    |      |                                                                                                                                                                                                      |             |
| Title                        | 1    | D;V Identify the study as developing and/or validating a multivariable prediction model, the target population, and the outcome to be predicted.                                                     | 1           |
| Abstract                     | 2    | D;V Provide a summary of objectives, study design, setting, participants, sample size, predictors, outcome, statistical analysis, results, and conclusions.                                          | 4-5         |
| <b>Introduction</b>          |      |                                                                                                                                                                                                      |             |
| Background and objectives    | 3a   | D;V Explain the medical context (including whether diagnostic or prognostic) and rationale for developing or validating the multivariable prediction model, including references to existing models. | 8-9         |
|                              | 3b   | D;V Specify the objectives, including whether the study describes the development or validation of the model or both.                                                                                | 9           |
| <b>Methods</b>               |      |                                                                                                                                                                                                      |             |
| Source of data               | 4a   | D;V Describe the study design or source of data (e.g., randomized trial, cohort, or registry data), separately for the development and validation data sets, if applicable.                          | 10,12       |
|                              | 4b   | D;V Specify the key study dates, including start of accrual; end of accrual; and, if applicable, end of follow-up.                                                                                   | FIG. 1      |
| Participants                 | 5a   | D;V Specify key elements of the study setting (e.g., primary care, secondary care, general population) including number and location of centres.                                                     | 10          |
|                              | 5b   | D;V Describe eligibility criteria for participants.                                                                                                                                                  | 11          |
|                              | 5c   | D;V Give details of treatments received, if relevant.                                                                                                                                                | N/A         |
| Outcome                      | 6a   | D;V Clearly define the outcome that is predicted by the prediction model, including how and when assessed.                                                                                           | 14-15       |
|                              | 6b   | D;V Report any actions to blind assessment of the outcome to be predicted.                                                                                                                           | 12-13       |
| Predictors                   | 7a   | D;V Clearly define all predictors used in developing or validating the multivariable prediction model, including how and when they were measured.                                                    | 12-13       |
|                              | 7b   | D;V Report any actions to blind assessment of predictors for the outcome and other predictors.                                                                                                       | 15          |
| Sample size                  | 8    | D;V Explain how the study size was arrived at.                                                                                                                                                       | 14          |
| Missing data                 | 9    | D;V Describe how missing data were handled (e.g., complete-case analysis, single imputation, multiple imputation) with details of any imputation method.                                             | 16, App 8   |
| Statistical analysis methods | 10a  | D Describe how predictors were handled in the analyses.                                                                                                                                              | 13, App 3-6 |
|                              | 10b  | D Specify type of model, all model-building procedures (including any predictor selection), and method for internal validation.                                                                      | 13-14       |
|                              | 10c  | V For validation, describe how the predictions were calculated.                                                                                                                                      | 14-15       |
|                              | 10d  | D;V Specify all measures used to assess model performance and, if relevant, to compare multiple models.                                                                                              | 10-11       |
|                              | 10e  | V Describe any model updating (e.g., recalibration) arising from the validation, if done.                                                                                                            | 15          |
| Risk groups                  | 11   | D;V Provide details on how risk groups were created, if done.                                                                                                                                        | 10-12       |

|                            |     |     |                                                                                                                                                                                                       |            |
|----------------------------|-----|-----|-------------------------------------------------------------------------------------------------------------------------------------------------------------------------------------------------------|------------|
| Development vs. validation | 12  | V   | For validation, identify any differences from the development data in setting, eligibility criteria, outcome, and predictors.                                                                         | App 1, 9   |
| <b>Results</b>             |     |     |                                                                                                                                                                                                       |            |
| Participants               | 13a | D;V | Describe the flow of participants through the study, including the number of participants with and without the outcome and, if applicable, a summary of the follow-up time. A diagram may be helpful. | Fig 1.     |
|                            | 13b | D;V | Describe the characteristics of the participants (basic demographics, clinical features, available predictors), including the number of participants with missing data for predictors and outcome.    | Table 1    |
|                            | 13c | V   | For validation, show a comparison with the development data of the distribution of important variables (demographics, predictors and outcome).                                                        | App 9      |
| Model development          | 14a | D   | Specify the number of participants and outcome events in each analysis.                                                                                                                               | Fig 1.     |
|                            | 14b | D   | If done, report the unadjusted association between each candidate predictor and outcome.                                                                                                              | 19, App 13 |
| Model specification        | 15a | D   | Present the full prediction model to allow predictions for individuals (i.e., all regression coefficients, and model intercept or baseline survival at a given time point).                           | 19, App 13 |
|                            | 15b | D   | Explain how to use the prediction model.                                                                                                                                                              | 18         |
| Model performance          | 16  | D;V | Report performance measures (with CIs) for the prediction model.                                                                                                                                      | 17         |
| Model-updating             | 17  | V   | If done, report the results from any model updating (i.e., model specification, model performance).                                                                                                   | 18         |
| <b>Discussion</b>          |     |     |                                                                                                                                                                                                       |            |
| Limitations                | 18  | D;V | Discuss any limitations of the study (such as nonrepresentative sample, few events per predictor, missing data).                                                                                      | 24         |
| Interpretation             | 19a | V   | For validation, discuss the results with reference to performance in the development data, and any other validation data.                                                                             | 20-22      |
|                            | 19b | D;V | Give an overall interpretation of the results, considering objectives, limitations, results from similar studies, and other relevant evidence.                                                        | 22         |
| Implications               | 20  | D;V | Discuss the potential clinical use of the model and implications for future research.                                                                                                                 | 23         |
| <b>Other information</b>   |     |     |                                                                                                                                                                                                       |            |
| Supplementary information  | 21  | D;V | Provide information about the availability of supplementary resources, such as study protocol, Web calculator, and data sets.                                                                         | 3          |
| Funding                    | 22  | D;V | Give the source of funding and the role of the funders for the present study.                                                                                                                         | 2          |

\*Items relevant only to the development of a prediction model are denoted by D, items relating solely to a validation of a prediction model are denoted by V, and items relating to both are denoted D;V. We recommend using the TRIPOD Checklist in conjunction with the TRIPOD Explanation and Elaboration document.

### Appendix 3. Approaches for Multi-Label with and without Auxiliary Task Learning

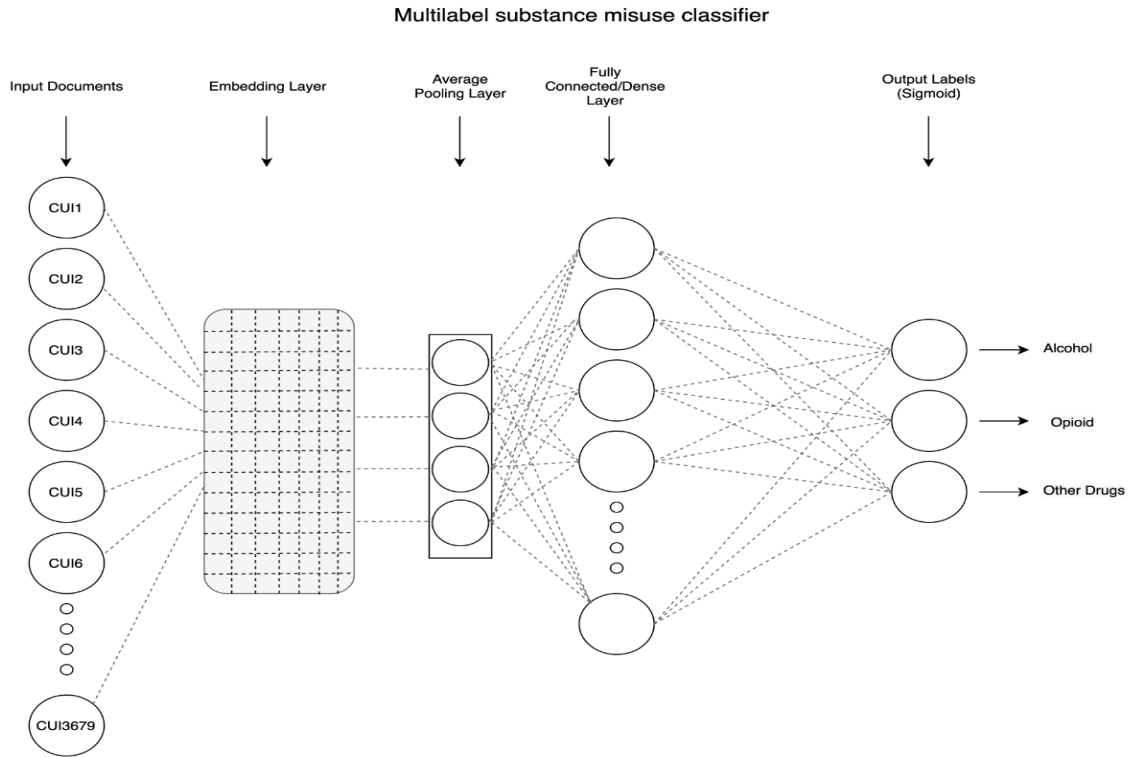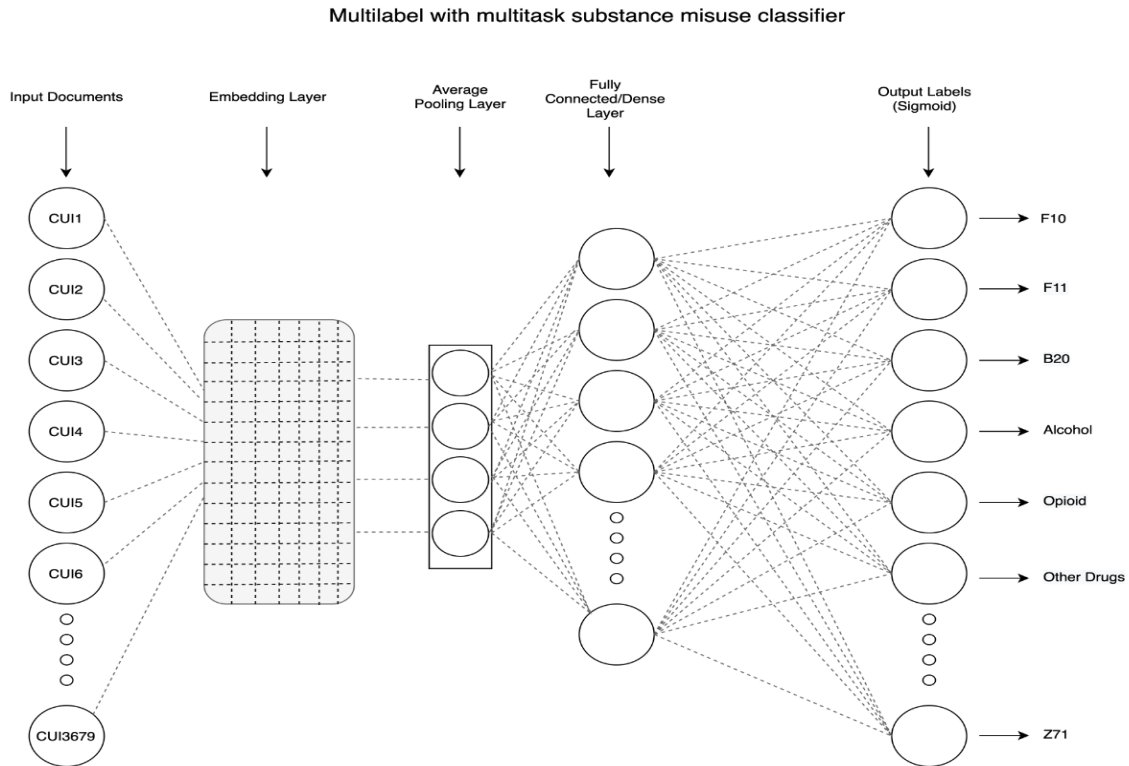

### Appendix 4. ICD-10 codes used for Auxiliary Training

| Elixhauser Comorbidity Index       |                                                                                                                                 |       | Substance User Disorder related ICD-10 codes |                                                     |                  |
|------------------------------------|---------------------------------------------------------------------------------------------------------------------------------|-------|----------------------------------------------|-----------------------------------------------------|------------------|
| Disease                            | ICD 10 Code                                                                                                                     | Count | Substance Use Disorder                       | ICD 10 Code                                         | Count            |
| OBESITY                            | E66.x                                                                                                                           | 19113 | Alcohol                                      | F10.x                                               | 3414             |
| Hypertension                       | I10.x                                                                                                                           | 17999 |                                              |                                                     |                  |
| Fluid and Electrolyte Disorder     | E22.2, E86.x, E87.x                                                                                                             | 16257 |                                              |                                                     |                  |
| Anemia Deficiency                  | D50.8, D50.9, D51.x - D53.x                                                                                                     | 16143 | Opioid                                       | F11.x<br><br>T40.0x, T40.1x, T40.2x, T40.3x, T40.4x | 1895<br><br>1510 |
| Hypertension Complication          | I11.x-I13.x, I15.x                                                                                                              | 15549 |                                              |                                                     |                  |
| Diabetes with Chronic Complication | E10.2 - E10.8, E11.2 - E11.8, E12.2 - E12.8, E13.2 - E13.8, E14.2 - E14.8                                                       | 11775 |                                              |                                                     |                  |
| Renal Failure                      | I12.0, I13.1, N18.x, N19.x, N25.0, Z49.0 - Z49.2, Z94.0, Z99.2                                                                  | 11505 | Cannabis                                     | F12.x                                               | 1895             |
| Chronic Pulmonary Disease          | I27.8, I27.9, J40.x - J47.x, J60.x - J67.x, J68.4, J70.1, J70.3                                                                 | 11049 |                                              |                                                     |                  |
| Weight Loss                        | E40.x - E46.x, R63.4, R64                                                                                                       | 10401 |                                              |                                                     |                  |
| Congestive heart failure           | I09.9, I11.0, I13.0, I13.2, I25.5, I42.0, I42.5 - I42.9, I43.x, I50.x, P29.0                                                    | 10039 | Sedative                                     | F13.x                                               | 200              |
| Other Neurological Disease         | G10.x - G13.x, G20.x - G22.x, G25.4, G25.5, G31.2, G31.8, G31.9, G32.x, G35.x - G37.x, G40.x, G41.x, G93.1, G93.4, R47.0, R56.x | 8871  |                                              |                                                     |                  |
| Depression                         | F20.4, F31.3 - F31.5, F32.x, F33.x, F34.1, F41.2, F43.2                                                                         | 8294  |                                              |                                                     |                  |
| Hypothyroidism                     | E00.x - E03.x, E89.0                                                                                                            | 6799  | Cocaine                                      | F14.x                                               | 938              |

|                                              |                                                                                                                                        |      |                    |       |    |
|----------------------------------------------|----------------------------------------------------------------------------------------------------------------------------------------|------|--------------------|-------|----|
| Coagulopathy                                 | D65 - D68.x, D69.1,<br>D69.3 - D69.6                                                                                                   | 4686 |                    |       |    |
| Valvular Disease                             | A52.0, I05.x - I08.x,<br>I09.1, I09.8, I34.x -<br>I39.x, Q23.0 - Q23.3,<br>Z95.2 - Z95.4                                               | 4320 |                    |       |    |
| Metastatic Cancer                            | C77.x - C80.x                                                                                                                          | 4281 | Other<br>Stimulant | F15.x | 84 |
| Peripheral Vascular<br>Disease               | I70.x, I71.x, I73.1,<br>I73.8, I73.9, I77.1,<br>I79.0, I79.2, K55.1,<br>K55.8, K55.9, Z95.8,<br>Z95.9                                  | 4049 |                    |       |    |
| Solid Tumor without<br>Metastasis            | C00.x - C26.x, C30.x -<br>C34.x, C37.x - C41.x,<br>C43.x, C45.x - C58.x,<br>C60.x - C76.x, C97.x                                       | 3953 |                    |       |    |
| Liver Disease                                | B18.x, I85.x, I86.4,<br>I98.2, K70.x, K71.1,<br>K71.3 - K71.5, K71.7,<br>K72.x - K74.x, K76.0,<br>K76.2 - K76.9, Z94.4                 | 3951 | Hallucinogen       | F16.x | 47 |
| Diabetes without<br>Chronic<br>Complications | E10.0, E10.1, E10.9,<br>E11.0, E11.1, E11.9,<br>E12.0, E12.1, E12.9,<br>E13.0, E13.1, E13.9,<br>E14.0, E14.1, E14.9                    | 3873 |                    |       |    |
| Paralysis                                    | G04.1, G11.4, G80.1,<br>G80.2, G81.x, G82.x,<br>G83.0 - G83.4, G83.9                                                                   | 3739 |                    |       |    |
| Rheumatoid Arthritis                         | L94.0, L94.1, L94.3,<br>M05.x, M06.x, M08.x,<br>M12.0, M12.3, M30.x,<br>M31.0 - M31.3, M32.x -<br>M35.x, M45.x, M46.1,<br>M46.8, M46.9 | 2721 | Inhalant           | F18.x | 3  |
| Psychoses                                    | F20.x, F22.x - F25.x,<br>F28.x, F29.x, F30.2,<br>F31.2, F31.5                                                                          | 2251 |                    |       |    |
| Alcohol Abuse                                | F10, E52, G62.1, I42.6,<br>K29.2, K70.0, K70.3,<br>K70.9, T51.x, Z50.2,<br>Z71.4, Z72.1                                                | 2070 |                    |       |    |

|                                   |                                                              |      |                         |       |     |
|-----------------------------------|--------------------------------------------------------------|------|-------------------------|-------|-----|
| Drug Abuse                        | F11.x - F16.x, F18.x,<br>F19.x, Z71.5, Z72.2                 | 1955 | Psychoactive<br>& Other | F19.x | 377 |
| Blood Loss Anemia                 | D50.0                                                        | 1837 |                         |       |     |
| Pulmonary<br>Circulation Disorder | I26.x, I27.x, I28.0,<br>I28.8, I28.9                         | 1513 |                         |       |     |
| Lymphoma                          | C81.x - C85.x, C88.x,<br>C96.x, C90.0, C90.2                 | 1359 | Non-<br>Psychoactive    | F55.x | 1   |
| Peptic Ulcer Disease              | K25.7, K25.9, K26.7,<br>K26.9, K27.7, K27.9,<br>K28.7, K28.9 | 1319 |                         |       |     |
| HIV/AIDS                          | B20.x - B22.x, B24.x                                         | 434  |                         |       |     |

'x' here denotes a number between 0-9 if they exist for the ICD code



## Appendix 5. Methods for each architecture used

### 1) Multi-label learning

The model trains on mutually exclusive labels with independent outcomes for alcohol misuse, opioid misuse, and non-opioid drug misuse. We did not provide any weights to the training loss for each misuse type.

### 2) Multi-task multi-label learning

The model trains on mutually exclusive labels with the independent outcomes for alcohol misuse, opioid misuse, and non-opioid drug misuse, along with substance use disorder-related ICD-9 and -10 codes as secondary labels [Figure]. In total, we had thirty different elixhauser comorbidity indexes, nine different SUD-related ICD code categories. We ran hcuppy python library to gather the elixhauser indexes for each encounter. We consider these extra labels as auxiliary labels intended to provide complexity to the model and improve the model learning capacity for the actual labels. We added weights for the loss as a hyperparameter during the model training. If  $L_s$  is a loss for actual outcomes and  $L_a$  for the auxiliary outputs, the total sum of loss is given by:

$$\text{Total Loss} = \text{weight} * L_s + (1 - \text{weight} * L_a)$$

## Model Experiments:

### 1) Logistic Regression

In logistic regression, the training dataset is fed into the model using a bag of CUIs approach. In this approach, we create a matrix of training datasets where every row is an encounter and columns as unique CUIs ( $n=37317$ ). Each unique CUI in a training document is counted and normalized across the entire document. We experimented with the model using different penalty values, the inverse of regularization strength  $C$  ranging from 0.001 to 1000, and class weight as balanced.

### 2) Feed Forward Neural Network

In a feed-forward neural network, the training dataset is fed into the model using a bag of CUIs approach. In this approach, we create a matrix of training datasets where every row is an encounter and columns as unique CUIs ( $n=37317$ ). Each unique CUI in a training document is counted and normalized across the entire document. The matrix passed through a fully connected or dense layer followed by ReLU for non-linearity. Finally, we add a sigmoid output to predict each substance misuse type. We tested with adam, rmsprop, and adagrad for optimizers, different dropouts between 0.1 to 0.9, and a learning rate from 0.01 to 0.0001.

### 3) Deep Averaging Neural Network

In a deep averaging neural network, the training dataset is limited to a maximum of 12000 words/CUIs. First, we create an embedding layer of dimension 300, which we average across the layer before sending the information to the dense layer, followed by ReLU for non-linearity. In the final layer, we add a sigmoid output for each substance misuse type. We experimented with adam and rmsprop optimizer, range of dropouts from 0.1 to 0.9 and learning rate from 0.01 to 0.0001. These neural networks had relatively fewer parameters to learn than the feed-forward neural network.

#### 4) Convolutional Neural Network

In a convolutional neural network, the training dataset is also limited to a maximum of 12000 words/CUIs. First, we create an embedding layer of dimension 300, followed by the CNN layer with different filter sizes. The learnable weight in this layer is sharable; hence it can extract features from the embedding layer even with a shallow network. The extracted features are sent through the max-pooling layer, followed by a fully connected layer. In the fully connected layer, we experimented with units ranging from 8 to 2048. Again, in the final layer, we add a sigmoid output for each substance misuse type. We also tested with adam optimizer, range of dropouts from 0.1 to 0.9 and learning rate from 0.01 to 0.0001.

#### 5) Transformer based Neural Network

Transformer-based neural networks are trending architecture that researchers in recent NLP breakthroughs have used. Transformer models use the attention mechanism, which provides context to each input sequence. Since the encounters have input sequences of larger than 500 CUIs, hence we avoid positional embeddings. The maximum input sequence was 6000, and we experimented with multiple attention heads and layers. Adam optimizer was used, with a learning rate range from 0.1 to 0.0001.

## Appendix 6. Hyperparameters for each model

| Model                                         | Hyperparameters                                                                                                                                                             | No of Parameters |
|-----------------------------------------------|-----------------------------------------------------------------------------------------------------------------------------------------------------------------------------|------------------|
| <b>Multi-Label DAN</b>                        | dense layer = 15000 units, dropout=0.3, optimizer = adam, learning rate = 0.0001, max length = 12000, batch size = 64                                                       | 53,632,511       |
| <b>Multi-Label BOW</b>                        | dense layer = 20000 units, dropout = 0.5, optimizer = adam, learning rate = 0.001, batch size = 64                                                                          | 746,420,003      |
| <b>Multi-Label Transformer</b>                | d_model: 1024, d_inner: 1024, n_head:4, n_layers:1, d_k:768, d_v:96, dropout:0.1, learning rate= 0.0001, batch =32, max length = 6000                                       | 47,396,867       |
| <b>Multi-Label CNN</b>                        | embedding size=300, filtersize = 3, filters = 1024, dropout=0.4, dense layer = 32 units, adam, learning rate = 0.0001, batch size = 128, max length = 12000                 | 12,521,156       |
| <b>Auxiliary-Task Multi-Label DAN</b>         | embedding size = 1024, dense dayer = 20000 units, dropout=0.4, adam, learning rate = 0.001, weight = 0.5, batch size = 64, max length = 12000                               | 54,217,650       |
| <b>Auxiliary-Task Multi-Label BOW</b>         | dense layer: 15000 units, dropout= 0.5, learning rate: 0.001, optimizer = adam, weight = 0.5, batch size = 64                                                               | 560,400,042      |
| <b>Auxiliary-Task Multi-Label Transformer</b> | d_model: 1024, d_inner: 1024, n_head:4, n_layers:1, d_k:768, d_v:96, dropout:0.1, learning rate= 0.0001, max length=6000, weight= 0.9, batch: 128                           | 47,436,842       |
| <b>Auxiliary-Task Multi-Label CNN</b>         | embedding size = 300, weight = 0.8, filtersize = 3, filters = 1024, dropout=0.5, dense = 32, optimizer = adam, learning rate = 0.0001, batch size = 128, max length = 12000 | 12,151,910       |

We split the training data set into 90% training set (n = 49423) and 10% development set (n = 5492). We trained using the training set and the model selection using the development set. We used a random search approach to tune the hyperparameters across each of the models. In random search, hyperparameters are selected randomly from a pool of hyperparameter space. The process repeats several times until we find the best hyperparameters that give the highest pr auc score. Unlike grid search, we did not use every combination of parameters from the hyperparameter space for a random search.

Hence, the parameter search time is quicker and still yields the best result. We experimented with eight different experiments using four Tesla V100 GPUs, python 3.6, PyTorch 1.4 version. For each of these experiments, we ran a random search until we found the best precision-recall area under the curve.

BOW = bag of words, DAN = deep averaging network, CNN = convolutional neural network,  $d_{model}$  = the number of expected feature in encoder/decoder input,  $d_k$  = keys for dimension,  $d_v$  = values for dimension,  $n_{head}$  = number of heads in the multi attention layer, max length = maximum length of the document, dense layer = number of neurons

## **Appendix 7. eXplainable Artificial Intelligence (XAI) with Local Interpretable Model-agnostic Explanations (LIME)**

We applied the LIME package to understand the highest weighted features that discriminate between cases and non-cases. LIME uses a local approximation to interpret a black box model such as neural networks by developing a linear model and assigning weights to each feature. For model selection, a grid search approach was applied to a small training dataset (30 documents) to get the best average  $R^2$  value to find the best hyperparameters. The primary hyperparameters we experimented with were feature selection (“forward selection”, “auto” “lasso\_path”, and “none”) and kernel width (ranging from 1 to 7). Then, we ran LIME on the 2000 subset of the entire training dataset keeping the prevalence of substance misuse the same as that of the whole cohort. The weights for all the features ( $n = 37371$ ) for each document were averaged and sorted to produce the top 25 weighted features. Next, we repeated the experiment for all the misuse types. For each misuse type, the best hyperparameter selected was “auto” for feature selection and 2 for the kernel width. The  $R^2$  values for alcohol, opioid, and nonopioid are 0.951, 0.961, 0.962, respectively.

**Appendix 8.** Not screened or incomplete screening data vs screened data characteristics

|                                 | <b>Not screened or Incomplete Screening<br/>(n=25715)</b> | <b>Screened<br/>(n=60567)</b> | <b>p - value</b> |
|---------------------------------|-----------------------------------------------------------|-------------------------------|------------------|
| Age, median (IQR)               | 62.0 (45.0 - 74.0)                                        | 60.0 (43.0, 71.0)             | <0.0001          |
| Male sex, n (%)                 | 10,643 (41.4%)                                            | 25953 (42.8%)                 | <0.0001          |
| Race+Ethnicity, n (%)           |                                                           |                               |                  |
| Non-Hispanic White              | 11205 (43.5%)                                             | 25725 (42.5%)                 | <0.0001          |
| Non-Hispanic Black              | 8978 (34.9%)                                              | 19850 (32.8%)                 |                  |
| Hispanic/Latinx                 | 3349 (13.0%)                                              | 10594 (17.5%)                 |                  |
| Mixed race+ethnicity            | 2183 (8.5%)                                               | 4398 (7.3%)                   |                  |
| Insurance, n (%)                |                                                           |                               |                  |
| Medicare                        | 9542 (37.1%)                                              | 21199 (35.0%)                 | <0.0001          |
| Medicaid                        | 8253 (32.1%)                                              | 20459 (33.8%)                 |                  |
| Private                         | 6655 (25.9%)                                              | 16024 (26.5%)                 |                  |
| Other                           | 1265 (4.9%)                                               | 2885 (4.8%)                   |                  |
| Comorbidities:                  |                                                           |                               |                  |
| Hypertension, n (%)             | 13488 (52.5%)                                             | 36220 (59.8%)                 | <0.0001          |
| Renal Failure, n (%)            | 4956 (19.3%)                                              | 12080 (19.9%)                 | 0.023            |
| Neurologic, n (%)               | 4029 (15.7%)                                              | 9681 (15.9%)                  | 0.249            |
| Congestive heart failure, n (%) | 4400 (17.1%)                                              | 10624 (17.5%)                 | 0.129            |
| Diabetes, n (%)                 | 6426 (24.9%)                                              | 16577 (27.4%)                 | <0.0001          |
| Liver disease, n(%)             | 1109 (4.3%)                                               | 4405 (7.3%)                   | <0.0001          |
| Chronic lung disease, n(%)      | 4791 (18.6%)                                              | 12033 (19.9%)                 | <0.0001          |
| Psychiatric disorders, n(%)     | 1563 (6.1%)                                               | 2778 (4.6%)                   | <0.0001          |
| Depression, n(%)                | 3073 (11.9%)                                              | 9193 (15.2%)                  | <0.0001          |
| Alcohol Misuse, n(%)            | 995 (3.9%)                                                | 2882 (4.8%)                   | <0.0001          |

|                            |               |               |         |
|----------------------------|---------------|---------------|---------|
| Drug Misuse, n(%)          | 934 (3.6%)    | 2637 (4.4%)   | <0.0001 |
| AIDS, n(%)                 | 166 (<1%)     | 498 (<1%)     | <0.0001 |
| Discharge Disposition (n%) |               |               | <0.0001 |
| Home                       |               |               |         |
| In-Hospital Death          | 13236 (51.5%) | 35676 (58.9%) |         |
| LT RC / ST PA              | 1739 (6.7%)   | 744 (<1%)     |         |
| AMA                        | 3271(9.2%)    | 7999 (13.2%)  |         |
| Other                      | 272 (3.6%)    | 604 (<1%)     |         |
|                            | 7197(14.6%)   | 15544 (25.7%) |         |

AMA = against medical advice; AIDS = acquired immunodeficiency syndrome; LT RC/ST PA = Long term residential care or short term post acute care

**Appendix Table 9.** Patient Characteristics and Outcomes from Training Cohort (n = 54915)

|                           | <b>Alcohol Misuse Only (n=927)</b> | <b>Opioid Misuse Only (n=579)</b> | <b>Non-opioid Misuse Only (n=195)</b> | <b>Polysubstance Misuse (n=220)</b> | <b>No Misuse (n=52994)</b> |
|---------------------------|------------------------------------|-----------------------------------|---------------------------------------|-------------------------------------|----------------------------|
| Age, median (IQR)         | 49.0 (39.0 - 59.0)                 | 49.0 (38.0 - 58.0)                | 52.0 (37.5 - 60.0)                    | 45.0 (32.0 - 56.0)                  | 61.0 (45.0 - 72.0)         |
| Male sex, n (%)           | 621 (66.9%)                        | 368 (63.6%)                       | 108(55.4%)                            | 142 (64.5%)                         | 21370(40.3%)               |
| Race+Ethnicity,n(%)       |                                    |                                   |                                       |                                     |                            |
| NH White                  | 400 (43.1%)                        | 177 (30.6%)                       | 27 (13.8%)                            | 74 (33.6%)                          | 22367(42.2%)               |
| NH Black                  | 263 (28.4%)                        | 314 (54.2%)                       | 122(62.6%)                            | 97 (44.1%)                          | 17284(32.6%)               |
| Hispanic                  | 201 (21.7%)                        | 67 (11.6%)                        | 35 (17.9%)                            | 35 (15.9%)                          | 9446(17.8%)                |
| Mixed                     | 63 (6.8%)                          | 21 (1.1%)                         | 11 (5.6%)                             | 14 (6.4%)                           | 3897 (7.4%)                |
| AUDIT Score, median (IQR) | 19.0 (11.0, 28.0) (n = 927)        | 0.0 (0.0, 1.0) (n = 128)          | 2.0 (0.0, 4.0) (n = 60)               | 21.0 (13.0, 29.0) (n=220)           | 2.0 (0.0, 3.0) (n = 1989)  |
| DAST Score, median (IQR)  | 1.0 (0.0, 1.0) (n = 175)           | 6.0 (4.0, 8.0) (n = 579)          | 3.0 (2.0, 6.0) (n = 195)              | 5.0 (3.0, 7.0) (n = 220)            | 0.0 (0.0, 1.0) (n = 1363)  |
| Insurance, n (%)          |                                    |                                   |                                       |                                     |                            |
| Medicare                  | 133 (14.3%)                        | 73 (12.6%)                        | 31 (15.9%)                            | 14 (6.4%)                           | 19872(37.5%)               |
| Medicaid                  | 432 (46.6%)                        | 405 (69.9%)                       | 117(60.0%)                            | 133 (60.4%)                         | 17056(32.2%)               |
| Private                   | 232 (25.0%)                        | 69 (11.9%)                        | 30 (15.4%)                            | 33 (15.0%)                          | 13832(26.1%)               |
| Other                     | 130 (14.0%)                        | 32 (5.5%)                         | 17 (8.7%)                             | 40 (18.2%)                          | 2234(4.2%)                 |
| Comorbidities, n(%)       |                                    |                                   |                                       |                                     |                            |
| Hypertension              | 512 (55.2%)                        | 291 (50.3%)                       | 128(65.6%)                            | 96 (43.6%)                          | 32441(61.2%)               |
| Renal Failure             | 83 (8.9%)                          | 89 (15.4%)                        | 51 (26.2%)                            | 15 (6.8%)                           | 11243(21.2%)               |
| Neurologic                | 206 (22.2%)                        | 86 (14.9%)                        | 29 (14.9%)                            | 45 (20.5%)                          | 8478(15.9%)                |
| CHF                       | 104 (11.2%)                        | 111 (19.2%)                       | 63 (32.3%)                            | 19 (8.6%)                           | 9722(18.3%)                |
| Diabetes                  | 137 (14.8%)                        | 100 (17.3%)                       | 56 (28.7%)                            | 34 (15.5%)                          | 15291(28.9%)               |
| Liver disease             | 318 (34.3%)                        | 78 (13.5%)                        | 14 (7.2%)                             | 42 (19.1%)                          | 3489(6.6%)                 |
| Chronic lung disease      | 174 (18.8%)                        | 222 (38.3%)                       | 74 (37.9%)                            | 58 (26.4%)                          | 10498(19.8%)               |

|                       |             |             |            |             |              |
|-----------------------|-------------|-------------|------------|-------------|--------------|
| Psychiatric disorders | 82 (8.8%)   | 99 (17.1%)  | 57 (29.2%) | 43 (19.5%)  | 1967 (3.7%)  |
| Depression            | 259 (27.9%) | 137 (23.7%) | 43 (22.1%) | 61 (27.7%)  | 7779 (14.7%) |
| Alcohol Misuse        | 742 (80.0%) | 56 (9.7%)   | 36 (18.5%) | 168 (76.4%) | 1061 (2.0%)  |
| Drug Misuse           | 98 (10.6%)  | 560 (96.7%) | 153(78.5%) | 168 (76.4%) | 971 (1.8%)   |
| AIDS                  | 22 (2.4%)   | 20 (3.5%)   | 16 (8.2%)  | 9 (<1%)     | 367 (<1%)    |
| Disposition, n (%)    |             |             |            |             |              |
| Home                  | 623 (67.2%) | 327 (56.5%) | 113(57.9%) | 138 (62.7%) | 30770(58.1%) |
| Death                 | 7 (<1%)     | 2 (<1%)     | 1 (<1%)    | 2 (<1%)     | 597 (1.1%)   |
| LT RC / ST PA         | 120 (12.9%) | 109 (18.8%) | 27(13.8%)  | 33 (15.0%)  | 7216 (13.6%) |
| AMA                   | 24 (2.6%)   | 56 (9.7%)   | 9 (4.6%)   | 20 (9.0%)   | 335 (<1%)    |
| Other                 | 153 (16.5%) | 85 (14.7%)  | 45(23.1%)  | 27 (12.3%)  | 1407626.6(%) |

Polysubstance misuse can include patients with alcohol and/or opioid misuse and/or non-opioid drug misuse; AMA = against medical advice; AIDS = acquired immunodeficiency syndrome; LT RC/ST PA = Long term residential care or short term post acute care; CHF = congestive heart failure; NH= non-Hispanic; Mixed = Asian, Native American or Alaskan Native, Native Hawaiian or Other Pacific Islander, Other, or Refuse/Unknown



**Appendix 10.** Full List of Cutpoints and Confusion Matrix for Temporal Validation Cohort for multi-label CNN classifier

| Misuse Type | F1   | PPV  | Sens | NPV  | Spec | Cutpoint | Confusion Matrix     |
|-------------|------|------|------|------|------|----------|----------------------|
| Alcohol     | 0.7  | 0.63 | 0.78 | 0.99 | 0.98 | 0.02     | 452, 125, 264, 16074 |
| Opioid      | 0.76 | 0.65 | 0.91 | 1    | 0.99 | 0.02     | 354, 33, 193, 16337  |
| Other Drug  | 0.45 | 0.33 | 0.72 | 1    | 0.99 | 0.02     | 123, 48, 247, 16499  |
|             |      |      |      |      |      |          |                      |
| Alcohol     | 0.73 | 0.73 | 0.74 | 0.99 | 0.99 | 0.05     | 425, 152, 159, 16181 |
| Opioid      | 0.8  | 0.73 | 0.89 | 1    | 0.99 | 0.05     | 343, 44, 130, 16400  |
| Other Drug  | 0.46 | 0.41 | 0.52 | 1    | 0.99 | 0.05     | 89, 82, 129, 16617   |
|             |      |      |      |      |      |          |                      |
| Alcohol     | 0.74 | 0.79 | 0.69 | 0.99 | 0.99 | 0.1      | 400, 177, 109, 16231 |
| Opioid      | 0.81 | 0.77 | 0.86 | 1    | 0.99 | 0.1      | 332, 55, 100, 16430  |
| Other Drug  | 0.43 | 0.47 | 0.4  | 0.99 | 1    | 0.1      | 68, 103, 77, 16669   |
|             |      |      |      |      |      |          |                      |
| Alcohol     | 0.74 | 0.83 | 0.67 | 0.99 | 1    | 0.15     | 384, 193, 81, 16259  |
| Opioid      | 0.81 | 0.79 | 0.84 | 1    | 0.99 | 0.15     | 326, 61, 87, 16443   |
| Other Drug  | 0.38 | 0.5  | 0.31 | 0.99 | 1    | 0.15     | 53, 118, 54, 16692   |
|             |      |      |      |      |      |          |                      |
| Alcohol     | 0.74 | 0.85 | 0.65 | 0.99 | 1    | 0.2      | 375, 202, 68, 16272  |
| Opioid      | 0.81 | 0.8  | 0.83 | 1    | 1    | 0.2      | 320, 67, 79, 16451   |
| Other Drug  | 0.34 | 0.52 | 0.25 | 0.99 | 1    | 0.2      | 43, 128, 40, 16706   |
|             |      |      |      |      |      |          |                      |
| Alcohol     | 0.72 | 0.86 | 0.62 | 0.99 | 1    | 0.25     | 355, 222, 57, 16283  |
| Opioid      | 0.82 | 0.82 | 0.82 | 1    | 1    | 0.25     | 318, 69, 71, 16459   |
| Other Drug  | 0.32 | 0.57 | 0.22 | 0.99 | 1    | 0.25     | 38, 133, 29, 16717   |
|             |      |      |      |      |      |          |                      |
| Alcohol     | 0.71 | 0.87 | 0.6  | 0.99 | 1    | 0.3      | 347, 230, 51, 16289  |
| Opioid      | 0.82 | 0.84 | 0.8  | 1    | 1    | 0.3      | 310, 77, 61, 16469   |
| Other Drug  | 0.3  | 0.6  | 0.2  | 0.99 | 1    | 0.3      | 34, 137, 23, 16723   |
|             |      |      |      |      |      |          |                      |
| Alcohol     | 0.7  | 0.88 | 0.59 | 0.99 | 1    | 0.35     | 339, 238, 46, 16294  |
| Opioid      | 0.82 | 0.85 | 0.79 | 1    | 1    | 0.35     | 306, 81, 54, 16476   |

|             |      |      |      |      |   |       |                     |
|-------------|------|------|------|------|---|-------|---------------------|
| Other Drug  | 0.26 | 0.59 | 0.17 | 0.99 | 1 | 0.35  | 29, 142, 20, 16726  |
|             |      |      |      |      |   |       |                     |
| Alcohol     | 0.7  | 0.9  | 0.57 | 0.99 | 1 | 0.4   | 329, 248, 38, 16302 |
| Opioid      | 0.82 | 0.86 | 0.78 | 0.99 | 1 | 0.4   | 302, 85, 50, 16480  |
| Other Drug  | 0.25 | 0.65 | 0.15 | 0.99 | 1 | 0.4   | 26, 145, 14, 16732  |
|             |      |      |      |      |   |       |                     |
| Alcohol     | 0.69 | 0.9  | 0.55 | 0.98 | 1 | 0.45  | 319, 258, 34, 16306 |
| Opioid      | 0.82 | 0.87 | 0.77 | 0.99 | 1 | 0.45  | 299, 88, 45, 16485  |
| Other Drug  | 0.23 | 0.69 | 0.14 | 0.99 | 1 | 0.45  | 24, 147, 11, 16735  |
|             |      |      |      |      |   |       |                     |
| Alcohol     | 0.67 | 0.91 | 0.53 | 0.98 | 1 | 0.5   | 304, 273, 31, 16309 |
| Opioid      | 0.82 | 0.88 | 0.77 | 0.99 | 1 | 0.5   | 297, 90, 40, 16490  |
| Other Drug  | 0.2  | 0.71 | 0.12 | 0.99 | 1 | 0.5   | 20, 151, 8, 16738   |
|             |      |      |      |      |   |       |                     |
| Alcohol     | 0.74 | 0.84 | 0.66 | 0.99 | 1 | 0.174 | 383, 194, 74, 16266 |
| Opioid      | 0.82 | 0.89 | 0.76 | 0.99 | 1 | 0.528 | 295, 92, 36, 16494  |
| Opioid Drug | 0.22 | 0.73 | 0.13 | 0.99 | 1 | 0.463 | 22, 149, 8, 16738   |

**Appendix 11.** Single default Cutpoint and Confusion Matrix for External Validation Cohort for multi-label CNN classifier

| Type    | F1   | PPV  | Sens | NPV  | Spec | Cutpoint | Confusion Matrix  |
|---------|------|------|------|------|------|----------|-------------------|
|         |      |      |      |      |      |          |                   |
| Opioid  | 0.55 | 0.98 | 0.38 | 0.76 | 1    | 0.5      | 130, 210, 2, 650  |
| Alcohol | 0.64 | 0.95 | 0.49 | 0.58 | 0.96 | 0.5      | 283, 297, 15, 404 |

## Appendix 12. Calibration Plots

Alcohol Non-Calibrated:

Unreliability Index P value: <0.01

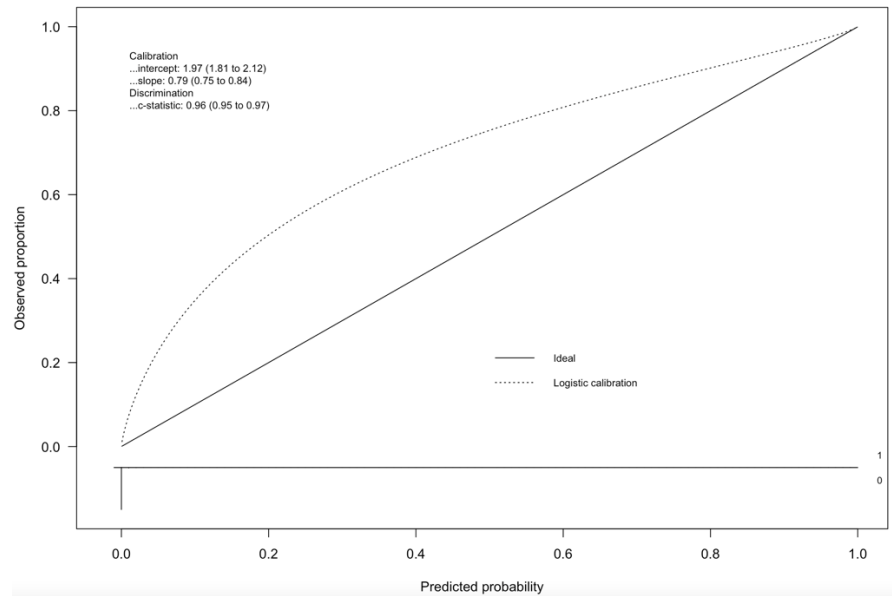

Alcohol Calibrated:

Unreliability Index P value: 0.135

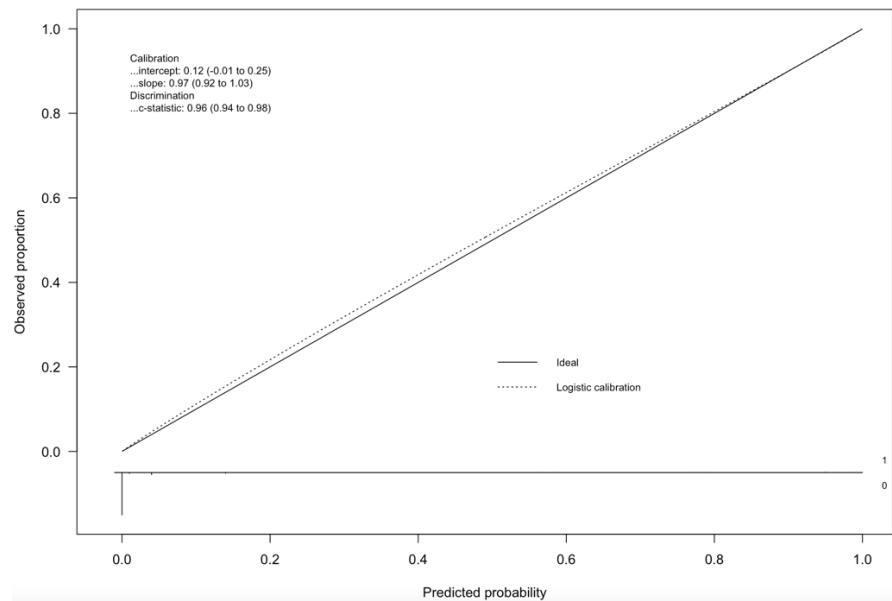

### Opioid Non-Calibrated:

Unreliability Index P value <0.0001

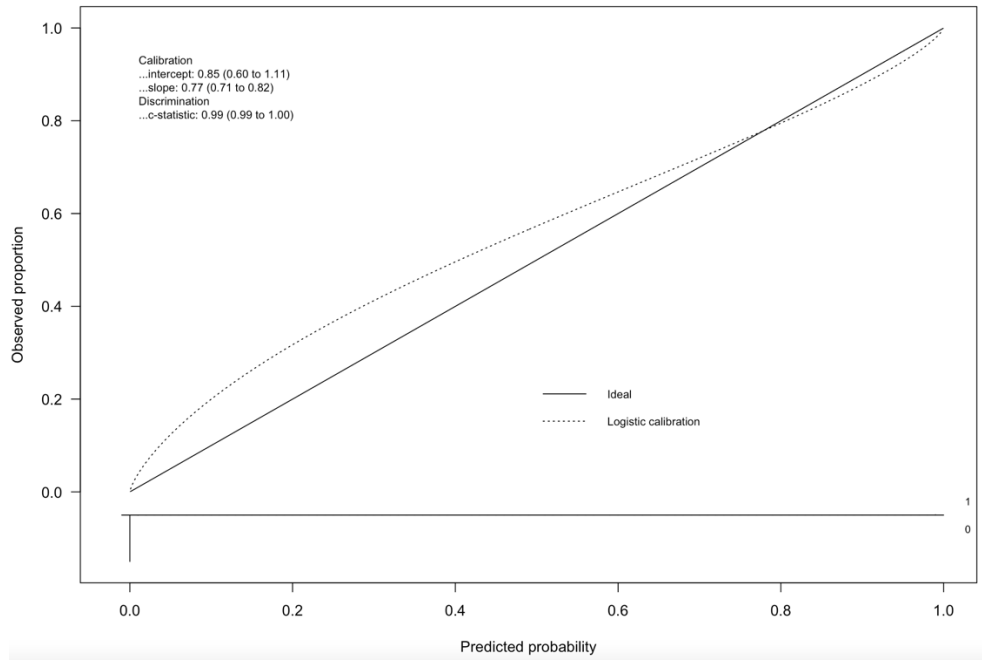

### Opioid Calibrated:

Unreliability Index P value: 0.095

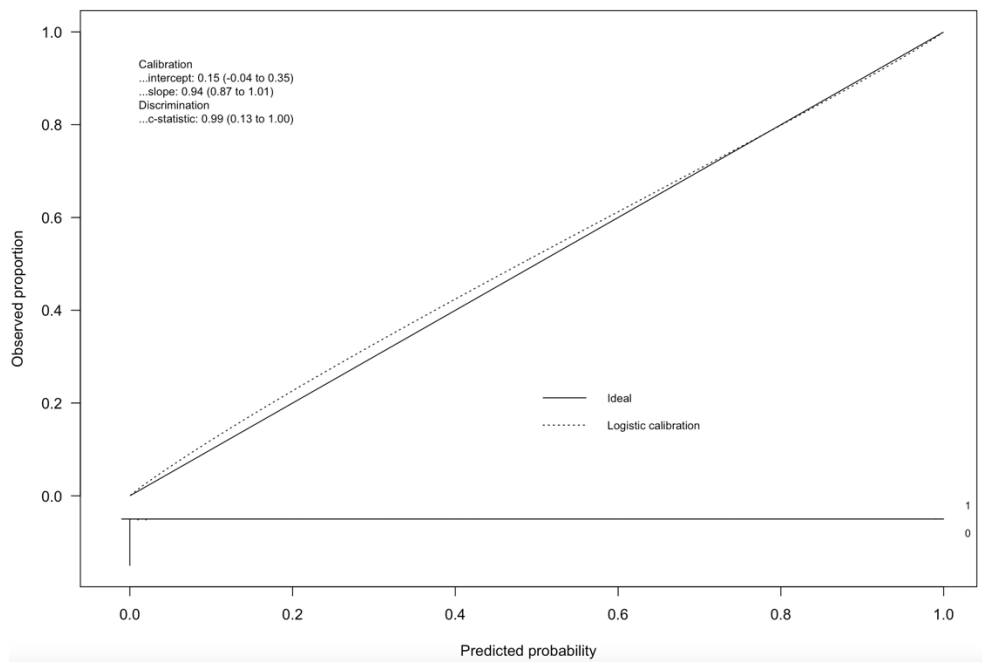

Non-Opioid Non-Calibrated:

Unreliability Index P value: 0.01

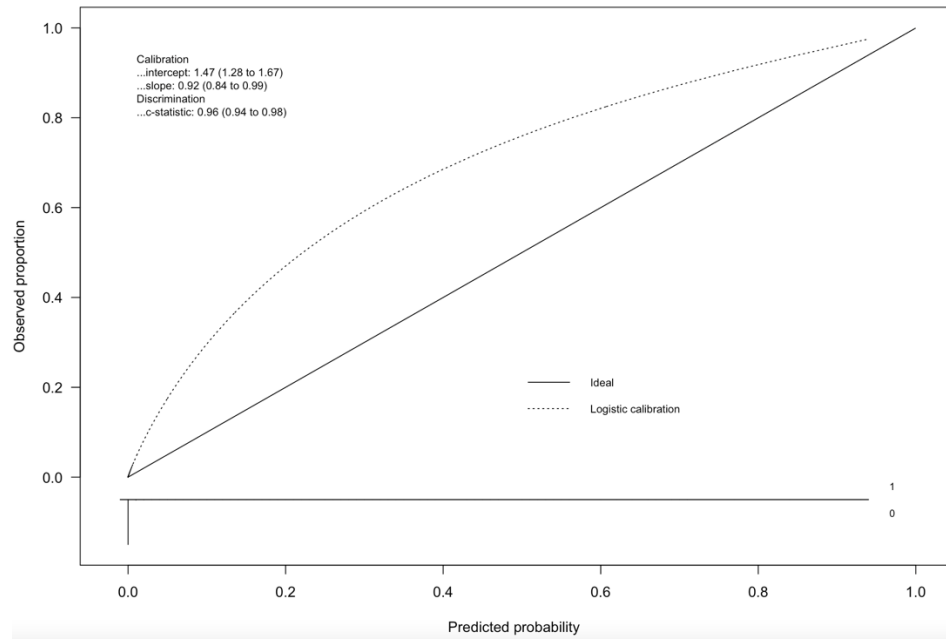

Non-Opioid Calibrated:

Unreliability Index P value: 0.051

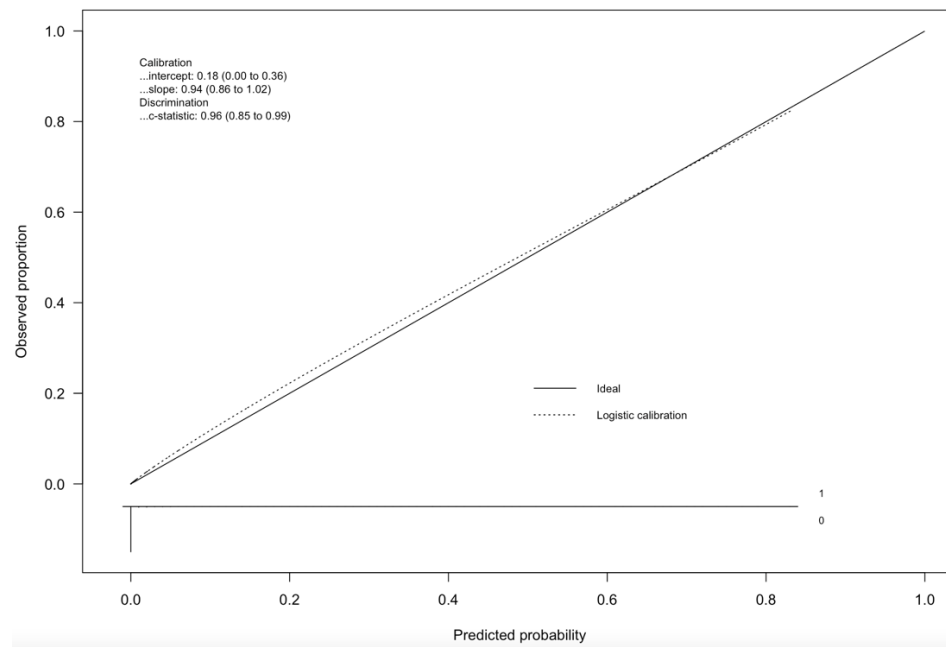

**Appendix 13.** Top 25 terms from a vocabulary of 37,317 unique terms

| Alcohol Misuse               |        | Opioid Misuse               |        | Non-Opioid Drug Misuse                             |        |
|------------------------------|--------|-----------------------------|--------|----------------------------------------------------|--------|
| CUI text                     | Weight | CUI text                    | Weight | CUI text                                           | Weight |
| Ethanol                      | 0.0058 | Heroin                      | 0.0046 | Cocaine                                            | 0.0042 |
| Alcohol Abuse                | 0.0010 | Smokes tobacco daily        | 0.0007 | Victim of abuse finding                            | 0.0013 |
| Thiamine                     | 0.0010 | Cocaine                     | 0.0006 | Cocaine user                                       | 0.0011 |
| Drink (dietary substance)    | 0.0010 | Victim of abuse finding     | 0.0005 | Drug abuse                                         | 0.0010 |
| Victim of abuse finding      | 0.0009 | Opioids                     | 0.0004 | Cocaine Abuse                                      | 0.0007 |
| Beer                         | 0.0005 | Methadone                   | 0.0004 | Smokes tobacco daily                               | 0.0006 |
| Cocaine                      | 0.0005 | Drug abuse                  | 0.0004 | Substance                                          | 0.0004 |
| Yes - Presence findings      | 0.0004 | Suboxone                    | 0.0003 | Polysubstance abuse                                | 0.0004 |
| Vitamins                     | 0.0004 | Opiates                     | 0.0003 | Marijuana                                          | 0.0003 |
| Smokes tobacco daily         | 0.0004 | Heroin Dependence           | 0.0002 | Ethanol                                            | 0.0003 |
| Alcohol withdrawal syndrome  | 0.0004 | Substance                   | 0.0002 | Screening for cancer                               | 0.0003 |
| Diazepam                     | 0.0003 | Cocaine user                | 0.0001 | Drink (dietary substance)                          | 0.0002 |
| Vitamin B complex            | 0.0003 | Tobacco user                | 0.0001 | Positive                                           | 0.0002 |
| Valium                       | 0.0002 | Chest                       | 0.0001 | Substance abuse problem                            | 0.0002 |
| Drinking function            | 0.0002 | Polysubstance abuse         | 0.0001 | Crack Cocaine                                      | 0.0002 |
| Disease                      | 0.0002 | Blood culture               | 0.0001 | Substance Abuse Detection                          | 0.0001 |
| Multivitamin preparation     | 0.0002 | Possible                    | 0.0001 | Beer                                               | 0.0001 |
| Vomiting                     | 0.0002 | Substance abuse problem     | 0.0001 | Disruptive, Impulse Control, and Conduct Disorders | 0.0001 |
| Complication                 | 0.0002 | Positive                    | 0.0001 | Type II Mucopolidosis                              | 0.0001 |
| Carbon Dioxide               | 0.0002 | Pain                        | 0.0001 | Injection procedure                                | 0.0001 |
| Distilled Alcoholic Beverage | 0.0002 | Asthma                      | 0.0001 | Tobacco user                                       | 0.0001 |
| Drug abuse                   | 0.0002 | Thoracic aorta              | 0.0001 | Pain                                               | 0.0001 |
| Screening for cancer         | 0.0002 | Social and personal history | 0.0001 | Scleral icterus                                    | 0.0001 |
| Ativan                       | 0.0002 | PMH- past medical history   | 0.0001 | Mean Corpuscular Volume                            | 0.0001 |
| Vodka                        | 0.0002 | Sweating                    | 0.0001 | Joints                                             | 0.0001 |

A sampling of 2,000 patients from the training cohort of 54,915 hospitalizations between 2017 and 2019. The features represent the related text for the Concept Unique Identifier (CUI) from the National Library of Medicine Metathesaurus
